# Supplementary material for: The Iron Content of Human Serum Albumin Modulates the Susceptibility of Acinetobacter baumannii to Cefiderocol
Source: MDPI journal article supplement (doi:10.3390/biomedicines11020639), 2023-02-20
Supplement: s1 [file s1]

**Table S1:** Comparison of the level of expression of iron associated and antibiotic resistance genes obtained by qRT-PCR in the two CRAB strains

| Gene name                        | AB5075 (Log <sub>2</sub> FC) |              | AMA40 (Log <sub>2</sub> FC) |              |
|----------------------------------|------------------------------|--------------|-----------------------------|--------------|
|                                  | HS HSA free                  | HPF HSA free | HS HSA free                 | HPF HSA free |
| TonB-dependent Receptors (TBDRs) |                              |              |                             |              |
| <i>pirA</i>                      | 3.36                         | 2.68         | 2.75                        | 1.82         |
| <i>piuA</i>                      | 3.92                         | 3.70         | 2.29                        | 2.75         |
| <i>bauA</i>                      | 2.18                         | 3.44         | 2.65                        | 1.50         |
| <i>bfnH</i>                      | 2.37                         | 2.92         | 3.43                        | 2.43         |
| β-lactamases genes               |                              |              |                             |              |
| <i>bla</i> <sub>OXA-51</sub>     | -1.38                        | -0.84        | -0.82                       | -0.88        |
| <i>bla</i> <sub>ADC</sub>        | -0.16                        | -1.14        | -1.47                       | -1           |
| <i>bla</i> <sub>OXA-23</sub>     | -0.09                        | -0.89        |                             |              |
| <i>bla</i> <sub>GES-14</sub>     | 0.08                         | -1.05        |                             |              |
| <i>bla</i> <sub>NDM-1</sub>      |                              |              | -1.25                       | -0.44        |

- Log<sub>2</sub>FC > 1 (p<0.05)     ● Log<sub>2</sub>FC < - 1 (p<0.05)  
● Log<sub>2</sub>FC (0-1)     ● Log<sub>2</sub>FC (-1-0)

**Table S2.** CFDC MICs for two CRAB representative strains performed using CFDC MTS strips (Liofilchem S.r.l., Italy) on Iron-depleted CAMHA (Cation Adjusted Mueller Hinton Agar) supplemented with 20  $\mu$ M or 40  $\mu$ M FeCl<sub>3</sub>.

| Strain | CAMHA | CAMHA + 20 $\mu$ M FeCl <sub>3</sub> | CAMHA + 40 $\mu$ M FeCl <sub>3</sub> |
|--------|-------|--------------------------------------|--------------------------------------|
| AMA40  | 0.25  | 1.5                                  | 3.0                                  |
| AB5075 | 0.19  | 1.5                                  | 2.0                                  |

CAMHA: Iron-depleted Cation Adjusted Mueller Hinton (treated with CHELEX as recommend by the CLSI).

**Table S3:** Minimal Inhibitory Concentrations (MICs) of cefiderocol (CFDC) for the CRAB AB5075 and AMA40 strains, performed using CFDC MTS strips (Liofilchem S.r.l., Italy) on Iron-depleted CAMHA (Cation Adjusted Mueller Hinton Agar) and supplemented with 20% of cerebrospinal fluid (CSF).

| Condition | CFDC MIC ( <i>mg/L</i> ) |          |
|-----------|--------------------------|----------|
|           | AB5075                   | AMA40    |
| CAMHB     | 0.50 (S)                 | 0.50 (S) |
| 20% CSF   | 0.38 (S)                 | 0.75 (S) |

CFDC: cefiderocol, S: Susceptible, R: Resistant

**Table S4.** Name of the primers used in the present study and their corresponding sequences.

| Primer Name                                 | Function           | 5'-3' Sequence           |
|---------------------------------------------|--------------------|--------------------------|
| <i>bla</i> <sub>OXA-51-like</sub> F         | $\beta$ -lactamase | ATGAACATTAAAACACTCTT     |
| <i>bla</i> <sub>OXA-51-like</sub> R         | $\beta$ -lactamase | TATAAAATACCTAATTGTTC     |
| <i>bla</i> <sub>OXA-23</sub> F              | $\beta$ -lactamase | CGAGTCAGATTGTTCAAGGA     |
| <i>bla</i> <sub>OXA-23</sub> R              | $\beta$ -lactamase | GCTCAACCCAGCCGGTCAAC     |
| <i>bla</i> <sub>GES-14</sub> F              | $\beta$ -lactamase | ACGCACTATTACTGGCAGGG     |
| <i>bla</i> <sub>GES-14</sub> R              | $\beta$ -lactamase | TCTCCTTGGGGATCGACGAT     |
| <i>bla</i> <sub>NDM-1</sub> F               | $\beta$ -lactamase | GAAGCTGAGCACCGCATTAG     |
| <i>bla</i> <sub>NDM-1</sub> R               | $\beta$ -lactamase | AACCAGATCGCCAAACCGTT     |
| <i>bauA</i> F                               | Iron uptake        | AAATGTTTGGCCGCGTTGAGGT   |
| <i>bauA</i> R                               | Iron uptake        | CAATCGTGCAAACGGTTCATCAGC |
| <i>pirA</i> F                               | Iron uptake        | GTCTATGGCTTTTGCTGCACA    |
| <i>pirA</i> R                               | Iron uptake        | GCGATTGCTTCACTTGCTCT     |
| <i>piuA</i> F                               | Iron uptake        | ATGGCGCAAGAAGCAGTTTC     |
| <i>piuA</i> R                               | Iron uptake        | TGTCTTTGAGAGGAGCCACG     |
| <i>bfnH</i> F                               | Iron uptake        | ACTGCGACTCGTACACCAAA     |
| <i>bfnH</i> R                               | Iron uptake        | ACTTTACGACCTGCCGTAGC     |
| <i>bla</i> <sub>ADC</sub> F ( <i>ampC</i> ) | $\beta$ -lactamase | TGCCAACCTTAACCCACA       |
| <i>bla</i> <sub>ADC</sub> R ( <i>ampC</i> ) | $\beta$ -lactamase | AGTTTGTAACGTTGCCGG       |

**Table S5.** Total protein concentration determined in CAMHB and different fluids analyzed using the ProteoExtract® Albumin/IgG Removal Kit (Sigma-Aldrich, MA, United States) following the manufacturer's recommendations.

|              | Protein concentration (mg/mL) | Reference |
|--------------|-------------------------------|-----------|
| CAMHB        | BLQ                           | This work |
| HPF          | 22.66 ± 4.53                  | This work |
| HPF HSA Free | BLQ                           | This work |
| HS           | 14.15 ± 0.31                  | This work |
| HS HSA Free  | BLQ                           | This work |

CAMHB: iron depleted cation adjusted Mueller Hinton, HSA: human serum albumin, HPF: human pleural fluids, HS: human serum, BLQ: below limit of quantification.

**Table S6.** Total Iron concentration determined in CAMHB and different fluids analyzed using the Iron Assay Kit (Sigma-Aldrich, MA, United States) following the manufacturer's recommendations.

|              | [Fe] total ( $\mu\text{M}$ ) | Reference |
|--------------|------------------------------|-----------|
| CAMHB        | BLQ                          | This work |
| HSA          | $65.4 \pm 0.39$              | This work |
| HSA Fe Free  | BLQ                          | This work |
| HPF          | $129.97 \pm 0.86$            | [1]       |
| HPF HSA Free | BLQ                          | This work |
| HS           | $65.45 \pm 0.46$             | This work |
| HS HSA Free  | BLQ                          | This work |
| CSF          | BLQ                          | This work |

CAMHB: iron depleted cation adjusted Mueller Hinton, HSA: human serum albumin, HPF: human pleural fluids, HS: human serum, CSF: cerebrospinal fluid, BLQ: below limit of quantification.

- [1] C. Pimentel *et al.*, "Human pleural fluid and human serum albumin modulate the behavior of a hypervirulent and multidrug-resistant (MDR) acinetobacter Baumannii representative strain," *Pathogens*, vol. 10, no. 4, pp. 1–13, 2021, doi: 10.3390/pathogens10040471.

**Figure S1.** SDS-PAGE of human fluids analyzed using the ProteoExtract® Albumin/IgG Removal Kit (Sigma-Aldrich, MA, United States)

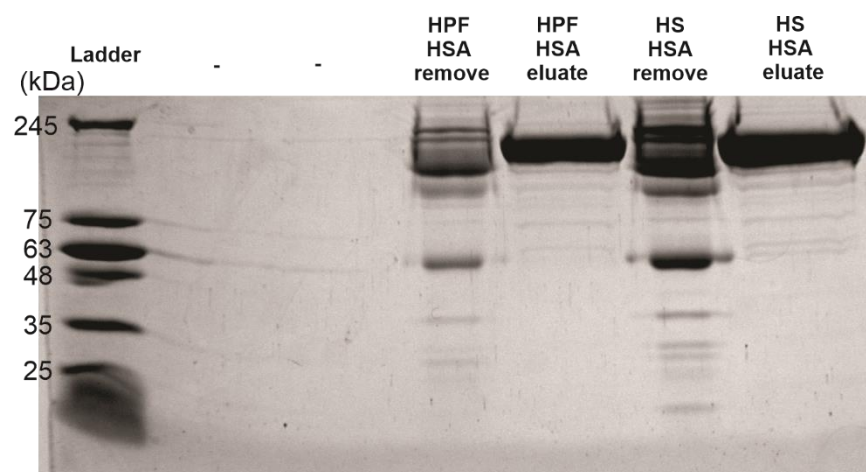

HSA: human serum albumin, HPF: human pleural fluids, HS: human serum.
